# Supplementary material
Source: PubMed Central journal article supplement (PMC6054166)
Supplement: cvy064_supplemental_material_dyck.pdf [file cvy064_supplemental_material_dyck.pdf]

# Co-administration of resveratrol with doxorubicin in young mice attenuates detrimental late-occurring cardiovascular changes

*Matsumura et al. – Doxorubicin-induced cardiovascular injury and resveratrol*

Nobutoshi Matsumura<sup>1,2,\*</sup>, Beshay N Zordoky<sup>1,3,\*</sup>, Ian M Robertson<sup>1,\*</sup>, Shereen M Hamza<sup>1</sup>, Nirmal Parajuli<sup>4</sup>, Carrie-Lynn M Soltys<sup>1</sup>, Donna L Beker<sup>1</sup>, Marianne K Grant<sup>3</sup>, Maria Razzoli<sup>5</sup>, Alessandro Bartolomucci<sup>5</sup>, and Jason RB Dyck<sup>1,†</sup>

Cardiovascular Research Centre, Department of Pediatrics<sup>1</sup> and Medicine<sup>4</sup>, Faculty of Medicine and Dentistry, University of Alberta, Edmonton, Alberta, Canada.

<sup>2</sup>Division of Cardiovascular Surgery, Tohoku University Graduate School of Medicine, Sendai, Miyagi, Japan

<sup>3</sup>Department of Experimental and Clinical Pharmacology, College of Pharmacy, University of Minnesota, Minneapolis, Minnesota, United States

<sup>5</sup>Department of Integrative Biology and Physiology, Medical School, University of Minnesota, Minneapolis, United States

\*These authors contributed equally to this work

**Supplemental Table 1. Cardiac function and morphology in control and DOX-treated mice after 2 Weeks of Saline or Angiotensin II infusion**

|                         | <b>Control+Saline</b> | <b>DOX+Saline</b> | <b>Control+AngII</b> | <b>DOX+AngII</b> |
|-------------------------|-----------------------|-------------------|----------------------|------------------|
| HR, bpm                 | 427±30                | 409±23            | 464±43               | 412±23           |
| <b>Cardiac Function</b> |                       |                   |                      |                  |
| EF, %                   | 57.2±2.9              | 53.9±1.9          | 58.1±2.2             | 56.4±2.6         |
| FS, %                   | 30.0±2.0              | 27.8±1.2          | 30.6±1.5             | 29.4±1.7         |
| E/A ratio               | 2.08±0.14             | 1.99±0.20         | 1.39±0.08*#          | 1.60±0.09        |
| <b>Morphology</b>       |                       |                   |                      |                  |
| IVS-diastole, mm        | 0.77±0.03             | 0.71±0.02         | 1.06±0.03*#          | 0.91±0.03*#†     |
| IVS-systole, mm         | 1.30±0.06             | 1.12±0.05         | 1.57±0.06*#          | 1.41±0.04#       |
| LVPW-systole, mm        | 1.10±0.09             | 1.06±0.04         | 1.28±0.07#           | 1.18±0.03        |
| LVD-diastole, mm        | 4.21±0.11             | 4.22±0.06         | 4.33±0.11            | 3.86±0.13†       |
| LVD-systole, mm         | 2.91±0.16             | 3.04±0.09         | 3.10±0.13            | 2.70±0.15        |
| LVEDV, µl               | 79.8±4.6              | 79.9±2.7          | 85.3±5.1             | 65.9±5.2†        |
| LVESV, µl               | 33.8±4.2              | 36.8±2.6          | 38.7±3.74            | 28.2±4.2         |

Values are mean ± SEM (n=9-14). DOX indicates doxorubicin; Ang II, angiotensin II; HR, heart rate; EF, ejection fraction; FS, fractional shortening; IVS, Intraventricular septal wall; LVPW, left ventricular (LV) posterior wall; LVD, LV dimension; LVEDV, LV end-diastolic volume; LVESV, LV end-systolic volume \*p<0.05 vs Control+Saline group, #p<0.05 vs DOX+Saline group, †p<0.05 vs Control+AngII group.

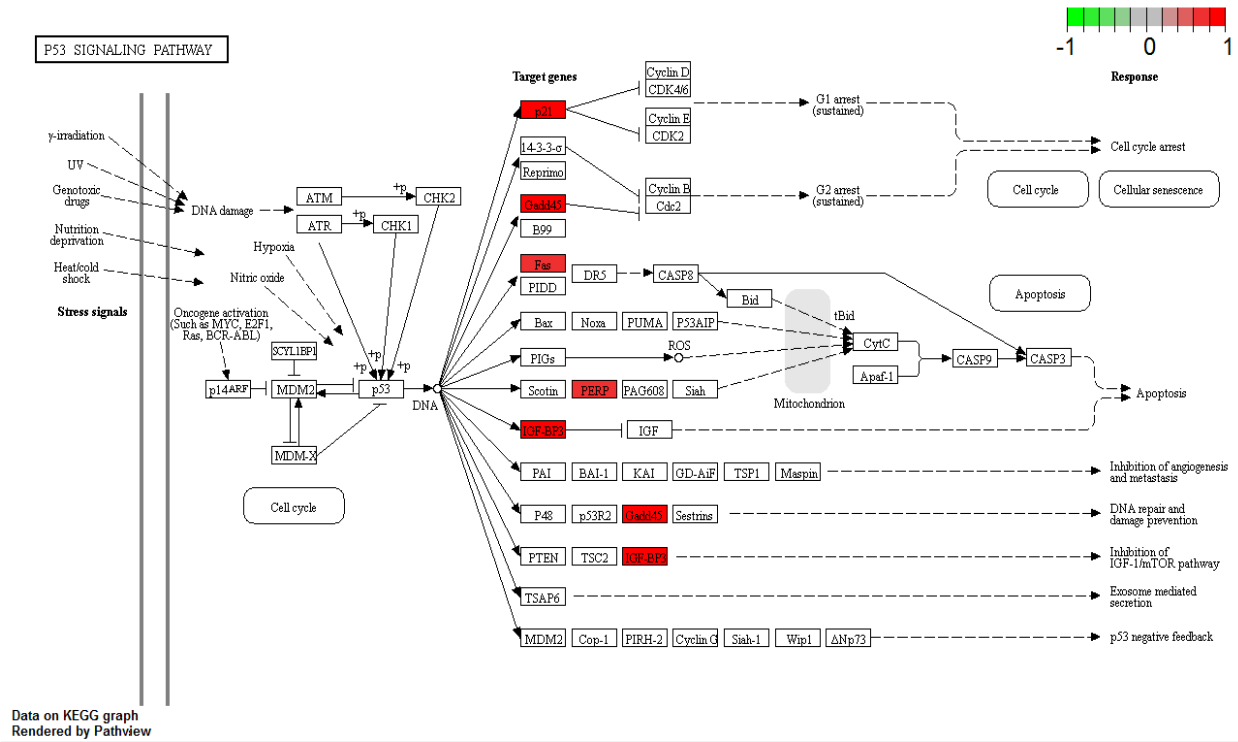

**Supplemental Figure 1: Angiotensin II (Ang II) infusion upregulates several p53 effector genes in hearts of DOX-treated mice compared to Ang II-infused control mice. Total RNA was extracted from heart tissues and gene expression was measured by RNA sequencing. Kyoto Encyclopedia of Genes and Genomes (KEGG) pathway analysis was performed to demonstrate significant changes in the p53 pathway.**
